# Supplementary material for: Characterisation of the gut microbial community of rhesus macaques in high-altitude environments
Source: BMC Microbiol. 2020 Mar 26;20:68. doi: 10.1186/s12866-020-01747-1 (PMC7098161; doi:10.1186/s12866-020-01747-1)
Supplement: Supplementary file 4 — Additional file 4. [file 12866_2020_1747_MOESM4_ESM.xls]

## Sheet: chao.samples
index	sobs	shannon	simpson	chao	ace	goods_coverage
BY-1	791	6.59512	0.971192	967.23	960.72	0.99867
BY-2	730	5.83807	0.943662	897	896.783	0.998461
BY-3	834	6.69676	0.973825	1000.79	959.311	0.998862
BY-4	855	6.25767	0.960587	1046.06	1072.07	0.998436
BY-5	797	6.44562	0.970718	999.8	957.024	0.998435
BY-6	707	6.11462	0.96752	984.594	948.853	0.99822
BY-7	864	5.80303	0.913839	1101.9	1041.21	0.998536
BY-8	709	6.2786	0.971626	918.373	893.054	0.998514
BY-9	881	6.62229	0.970083	1044.04	1014.91	0.998797
BY-10	868	6.65988	0.971227	1032.45	974.393	0.999117
GB-1	1107	6.91186	0.977566	1261.73	1254.32	0.998891
GB-2	1130	7.13825	0.981599	1365.19	1325.57	0.998534
GB-3	1058	7.12099	0.980325	1337.4	1281.87	0.998037
GB-4	1107	7.32116	0.983559	1297.74	1238.91	0.998763
GB-5	1039	7.02908	0.979012	1244.03	1237.98	0.998111
GB-6	1034	6.83699	0.974757	1254.28	1214.5	0.998436
GB-7	952	6.73343	0.975668	1169.1	1163.18	0.998114
GB-9	955	6.55589	0.961679	1182.89	1136.74	0.998791
GB-10	1001	6.88715	0.978206	1231.67	1178.21	0.998791
GB-8	986	6.74152	0.979203	1130.22	1140.76	0.999011
JD-1	844	6.07506	0.967165	1009.31	1002.82	0.998638
JD-2	1003	7.03907	0.979705	1184.25	1157.59	0.998557
JD-3	897	5.68882	0.909294	1070.67	1072.21	0.998451
JD-4	808	6.24949	0.966342	952.9	947.608	0.998375
JD-5	932	6.88846	0.980175	1068.99	1047.09	0.998691
JD-6	879	6.4005	0.968221	1016.53	1017.61	0.998567
JD-7	1011	7.15927	0.982294	1190.34	1152.87	0.998583
JD-8	980	7.01219	0.980224	1104.32	1093.63	0.99873
JD-9	822	6.05838	0.959753	1035.5	1000.3	0.99852
JD-10	840	6.59647	0.974211	1013.07	1005.08	0.998285
BDC-1	704	6.53373	0.974421	823.529	802.014	0.997963
BDC-2	715	5.35947	0.896065	811.192	805.834	0.998096
BDC-3	758	5.97055	0.942221	913.013	889.497	0.997403
BDC-4	702	5.06275	0.869355	833.015	805.135	0.997887
BDC-5	641	5.13894	0.893062	776.159	746.539	0.997768
BDC-6	716	6.39852	0.968819	819.618	811.062	0.998297
BDC-7	689	6.38027	0.96763	799.08	806.16	0.998489
BDC-8	673	5.66332	0.923123	823.519	776.181	0.998002
BDC-9	610	5.15254	0.906656	697.851	691.792	0.998252
BDC-10	744	6.45245	0.970404	872.182	856.63	0.997763
LHS-1	746	4.71492	0.842413	921.161	906.167	0.997149
LHS-2	711	4.65711	0.836119	837.879	843.558	0.997441
LHS-3	904	5.70431	0.886408	1063.41	1029.66	0.997653
LHS-4	768	5.81133	0.941965	885.229	869.101	0.998021
LHS-5	944	6.43468	0.948295	1107.4	1075.34	0.9977
LHS-6	866	6.42021	0.957115	1021.87	996.928	0.997431
LHS-7	771	5.92254	0.954636	898.263	893.496	0.997622
LHS-8	853	6.31967	0.963878	971.239	961.383	0.998162
LHS-9	876	6.47414	0.963058	1006.41	980.283	0.99777
LHS-10	697	5.04194	0.86689	846.536	843.918	0.997637
LHS-11	752	5.81391	0.944203	874.225	871.577	0.997639
LHS-12	730	5.20146	0.912188	881.337	857.884	0.997441
LHS-13	771	5.39961	0.880755	905.101	895.303	0.9977
LHS-15	881	5.86163	0.922485	1048.17	1006.99	0.997314
LHS-14	891	6.73664	0.970496	995.184	992.891	0.997707
LS-1	923	6.42112	0.962895	1121.66	1074.24	0.998465
LS-2	923	6.9209	0.976857	1067.22	1057.67	0.998656
LS-3	887	6.20288	0.959457	1066.45	1063.74	0.998482
LS-4	767	5.73385	0.944604	930.239	922.689	0.998531
LS-5	873	5.9766	0.924502	1013.94	1002.86	0.998551
LS-6	838	5.94076	0.953701	995.179	977.735	0.998724
LS-7	949	6.67959	0.965575	1095.06	1081.17	0.998708
LS-8	882	6.18364	0.941856	1115.76	1053.37	0.998489
LS-10	886	5.96946	0.931398	1065.85	1026.15	0.998726
YS-1	911	7.1588	0.986912	1173.91	1158.67	0.997869
YS-3	1076	6.64266	0.975934	1245.39	1225.14	0.99889
YS-4	1050	6.64078	0.974146	1251	1218.58	0.998474
YS-5	1030	6.88924	0.979337	1202.49	1188.83	0.998617
YS-6	992	6.58948	0.975563	1203.1	1172.66	0.998487
YS-7	1025	6.41522	0.963267	1194.72	1197.95	0.998637
YS-8	1096	6.77291	0.977091	1286.51	1272.94	0.998456
YS-9	953	6.41487	0.963392	1107.9	1102.2	0.998477
YS-10	1026	6.72758	0.975952	1188.53	1202.36	0.998264
